# Supplementary material
Source: bioRxiv or medRxiv preprint supplement (https://www.biorxiv.org/highwire/filestream/1717/field_highwire_adjunct_files/13/006932-3.pdf)

## A A.1 Hydrogen-peroxide detoxification

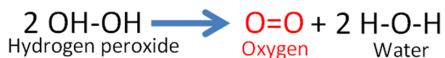

## A.2 Aminoacetone conversion to methylglyoxal

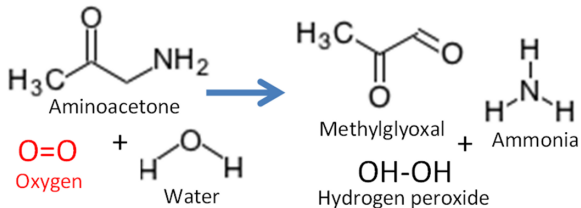

## B L-aspartate oxidase (EC: 1.4.3.16)

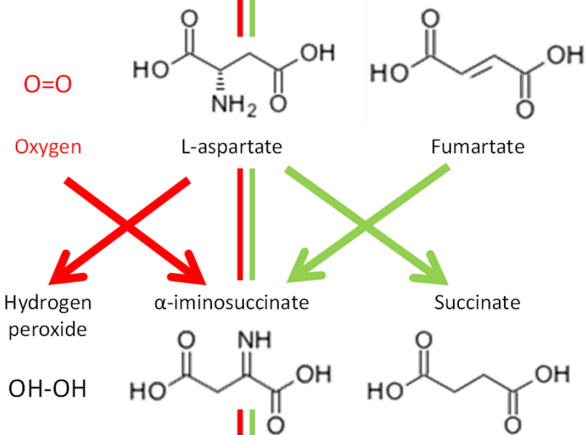

## C

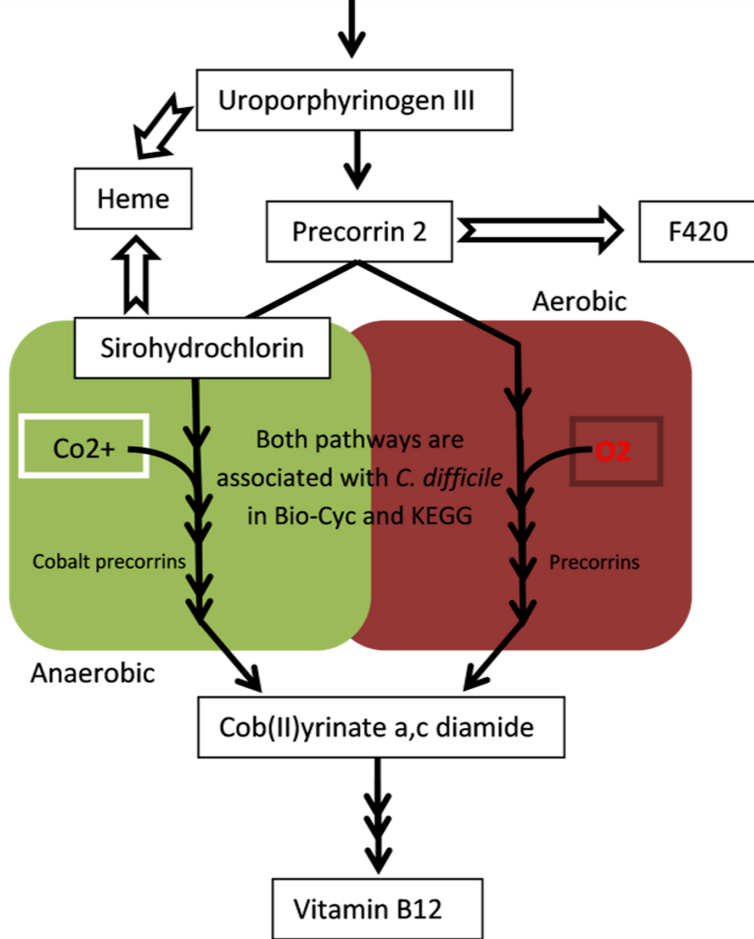

Supplement: Supplementary file [file 006932-3.pdf]
